# Supplementary material for: Wnt modulates MCL1 to control cell survival in triple negative breast cancer
Source: BMC Cancer. 2014 Feb 24;14:124. doi: 10.1186/1471-2407-14-124 (PMC3936852; doi:10.1186/1471-2407-14-124)
Supplement: Additional file 1: Figure S1 — WNT5B is upregulated in TNBC from microarray analysis. Figure S2. WNT5B was upregulated in TNBC. RT-PCR of WNT5B in breast cancer cell lines. Figure S3. Knockdown of WNT5B led to cell size change and decreased cell proliferation in MDA-MB-231 cells. (A) Cells were transduced with shWNT5B lentiviral particles, and cell size change was measured by flow cytometry 3 days after shWNT5B expression. (B) 2000 cells were seeded into 96-well plate and infected with shCtl or shWNT5B virus. The cell proliferation were evaluated in 3 days after infection. **P < 0.01. Figure S4. Statistical analysis of WNT5B with its correlated genes. (A) WNT5B expression was significantly correlated with Myc, P = 3.7e-6, r = 0.15. (B) WNT5B level was statistically correlated with MCL1, P = 5.8e-9, r = 0.19. The data were collected from the public microarray TCGA in which 779 breast tumors were studied in the cohort. Figure S5. Clinical correlation of WNT5B with metastasis. Figure S6. Clinical correlation of WNT5B with disease-free survival. (A) Disease-free survival analysis in the high WNT5B and low WNT5B groups using the data pulled from the studies by Desmedt et al. n = 127, P = 0.0234. (B) Same analysis using data pulled from Wang et al. n = 71, P = 0.0311. Both studies used probe WNT5B_221029_s_at. Table S1. Primers used in this study. Table S2. Cohorts used in this study. Table S3. IHC staining of Myc and MCL1. [file 1471-2407-14-124-S1.pdf]

## Supplemental Data

### Supplementary Figure 1

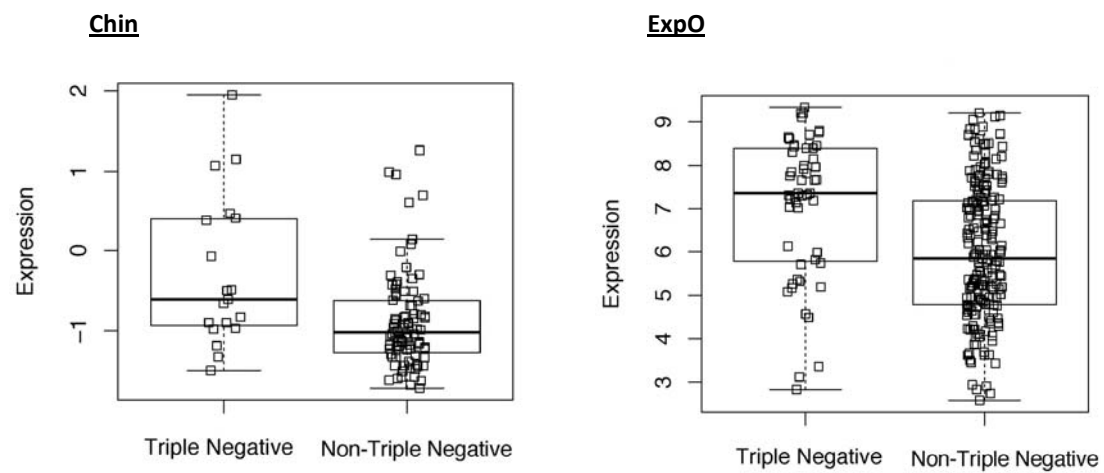

Supplementary Figure 1. WNT5B is upregulated in TNBC from microarray analysis. Differential expression of WNT5B in triple negative and non-triple negative patients was analyzed. Both studies used the probe WNT5B\_221029\_s\_at and  $P$  value was determined by  $t$ -test in R.  $P = 0.0155$  in Chin cohort ( $n = 130$ ) and  $P = 5.09e-05$  in expO study ( $n = 354$ ).

**Supplementary Figure 2**

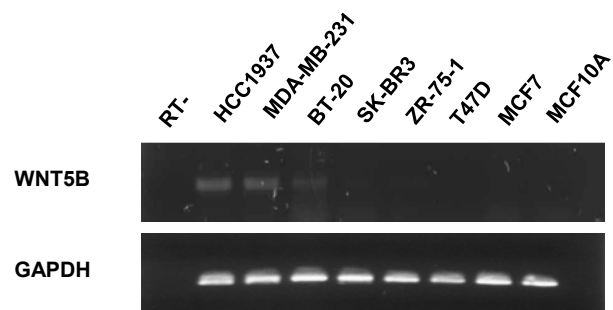

Supplementary Figure 2. WNT5B was upregulated in TNBC. RT-PCR of WNT5B in breast cancer cell lines. HCC1937, MDA-MB-231 and BT20 were TNBC-derived cell lines. The others were non-TNBC-derived cell lines.

### Supplementary Figure 3

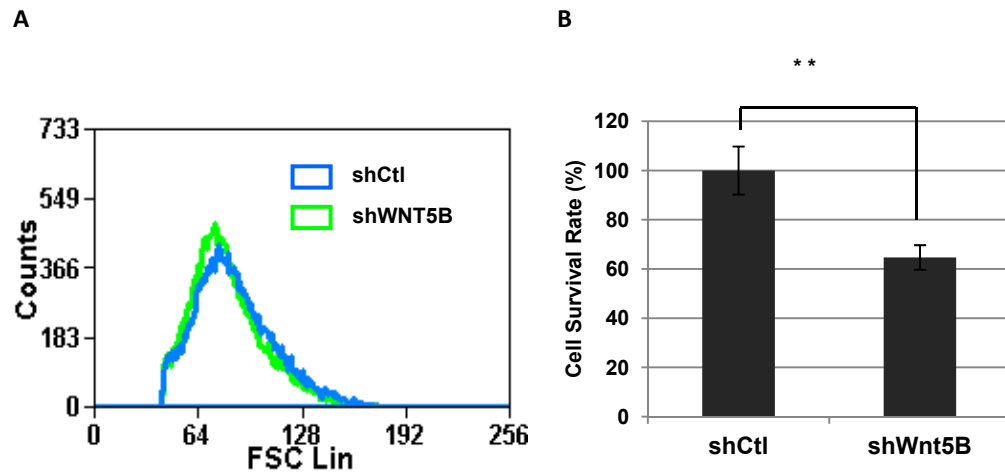

Supplementary Figure 3. Knockdown of WNT5B led to cell size change and decreased cell proliferation in MDA-MB-231 cells. (A) Cells were transduced with shWNT5B lentiviral particles, and cell size change was measured by flow cytometry 3 days after shWNT5B expression. (B) 2000 cells were seeded into 96-well plate and infected with shCtl or shWNT5B virus. The cell proliferation were evaluated in 3 days after infection. \*\*  $P < 0.01$ .

#### Supplementary Figure 4

A

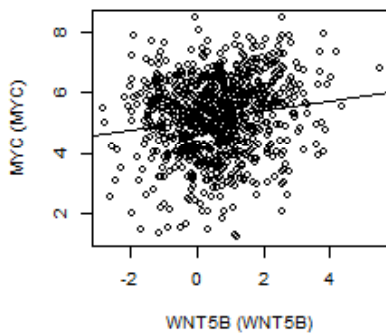

B

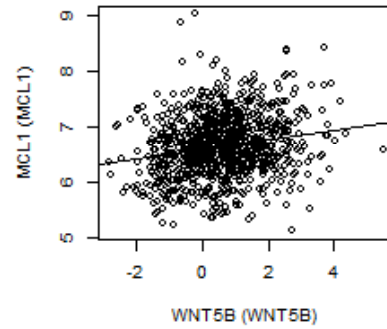

Supplementary Figure 4. Statistical analysis of WNT5B with its correlated genes. (A) WNT5B expression was significantly correlated with Myc,  $P = 3.7\text{e-}6$ ,  $r = 0.15$ . (B) WNT5B level was statistically correlated with MCL1,  $P = 5.8\text{e-}9$ ,  $r = 0.19$ . The data were collected from the public microarray TCGA in which 779 breast tumors were studied in the cohort.

**Supplementary Figure 5**

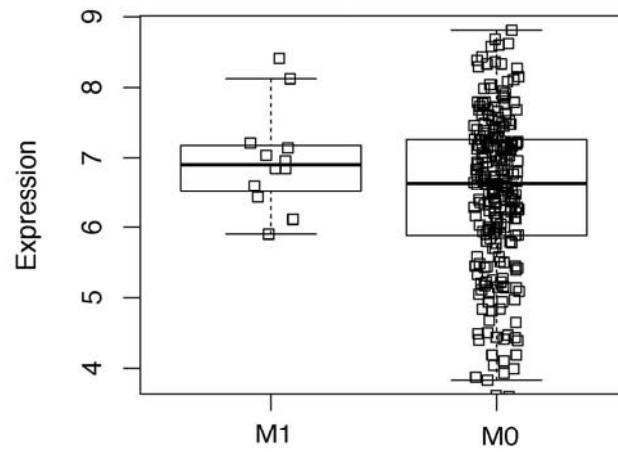

Supplementary Figure 5. Clinical correlation of WNT5B with metastasis. Differential expression of WNT5B in metastasis (M1) and non-metastasis (M0) groups for the samples in expO study.  $P = 0.0432$ ; probe, WNT5B\_223537\_s\_at.

**Supplementary Figure 6**

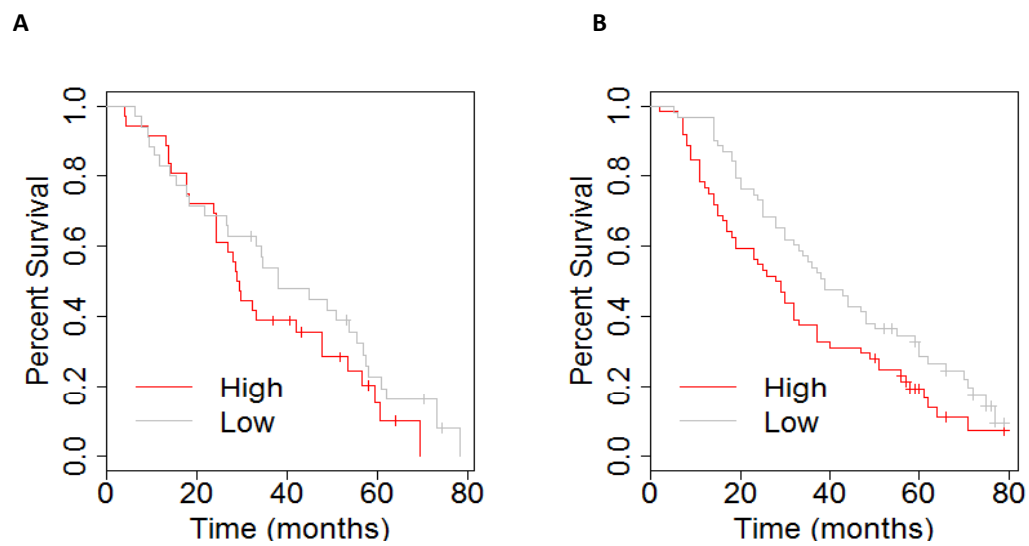

Supplementary Figure 6. Clinical correlation of WNT5B with disease-free survival. (A) Disease-free survival analysis in the high WNT5B and low WNT5B groups using the data pulled from the studies by Desmedt et al.  $n = 127$ ,  $P = 0.0234$ . (B) Same analysis using data pulled from Wang et al.  $n = 71$ ,  $P = 0.0311$ . Both studies used probe WNT5B\_221029\_s\_at.

**Supplementary Table1. Primers used in this study**

| <b>Primer</b> | <b>Gene Description</b>                               | <b>Sequence(5' → 3')</b> |
|---------------|-------------------------------------------------------|--------------------------|
| ATP5G1 R      | ATP synthase subunit b'                               | GCCAAGAATGGCATAGGAGA     |
| ATP5G1 F      | ATP synthase subunit b'                               | ACATTGACACAGCAGCCAAG     |
| CYC1 R        | cytochrome c-1                                        | TATGCCAGCTTCCGACTCTT     |
| CYC1 F        | cytochrome c-1                                        | CCAGCTACCATGTCCCAGAT     |
| MtDNA COX2 R  | cytochrome c oxidase subunit II                       | TAAAGGATGCGTAGGGATGG     |
| MtDNA COX2 F  | cytochrome c oxidase subunit II                       | TTCATGATCACGCCCTCATA     |
| GAPDH-R       | glyceraldehyde-3-phosphate dehydrogenase              | CAGACCCTAGAATAAGACAGG    |
| GAPDH-F       | glyceraldehyde-3-phosphate dehydrogenase              | ACTGCCAACGTGTCAGTGGTG    |
| HBB int R     | hemoglobin, beta                                      | AATCCAGCCTTATCCCAACC     |
| HBB int F     | hemoglobin, beta                                      | TATCATGCCTCTTTGCACCA     |
| Wnt5B3eF      | wingless-type MMTV integration site family, member 5B | AGACTGGCATCAAGGAATGC     |
| Wnt5B4eR      | wingless-type MMTV integration site family, member 5B | GCTGATGGCGTTGACCAC       |

**Supplementary Table 2. Cohorts used in this study**

| Cohort name | Number of samples | Publication* (PMID) | Analysis   |            |                       |
|-------------|-------------------|---------------------|------------|------------|-----------------------|
|             |                   |                     | TNBC DEG * | Metastasis | Disease-free survival |
| Chin        | 130               | 17157792            | X          |            |                       |
| expO        | 354               | GSE2109             | X          | X          |                       |
| TCGA        | 779               | 23000897            | X          | X          |                       |
| Desmedt     | 198               | 17545524            |            |            | X                     |
| Wang        | 286               | 15721472            |            |            | X                     |

\* GEO ID was used for expO (Expression project for Oncology); DEG: Differential expression gene

|      |       |     |      |       |
|------|-------|-----|------|-------|
| Myc  | G I   | 2   | 2    | 43    |
|      | G II  | 4   | 41   | 14    |
|      | G III | 27  | 5    | 4     |
|      |       | G I | G II | G III |
| MCL1 |       |     |      |       |

Correlation study of Myc and MCL1 for IHC staining. Correlation study of Myc and MCL1 for IHC staining. IHC staining was carried out in 142 breast tumor tissue array FFPE specimens. The staining was graded as G I, weakest staining; G II, moderate staining; and G III, strongest staining. The stained slides were reviewed, and the grade was given to each specimen for each staining. The correlation was analyzed by using correlation test function in R.  $P = 2.2\text{e-}16$ ,  $r = 0.73$ .
